# Supplementary material for: A two-dimensional cadmium-based metal–organic framework as an excellent probe: highly selective luminescent “turn on” detection of tetrahydrofuran and quantitative analysis of water
Source: Royal Society of Chemistry journal article supplement (doi:10.1039/d3nj05251f), 2024-01-01
Supplement: d3nj05251f1.pdf [file d3nj05251f1.pdf]

**A two-dimensional cadmium-metal organic framework as an excellent probe: highly selective luminescent “turn on” detection of tetrahydrofuran and quantitative analysis of water**

*Bowen Qin,\* Shuaiyu Chen, Guanghao Song, Wenzhe Sun, Wanting Li, Dan Yue, Bing Zhang, Weidong Li, Qiang Ma, Zhenling Wang\**

College of Materials Engineering, Henan International Joint Laboratory of Rare Earth Composite Materials, Henan University of Engineering, Zhengzhou 451191, P. R. China

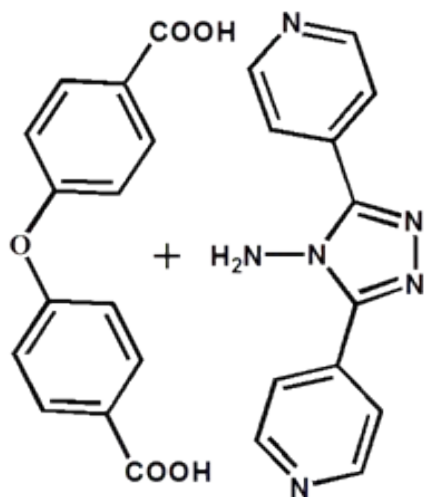

**Fig. S1** The organic ligands of Cd-MOF.

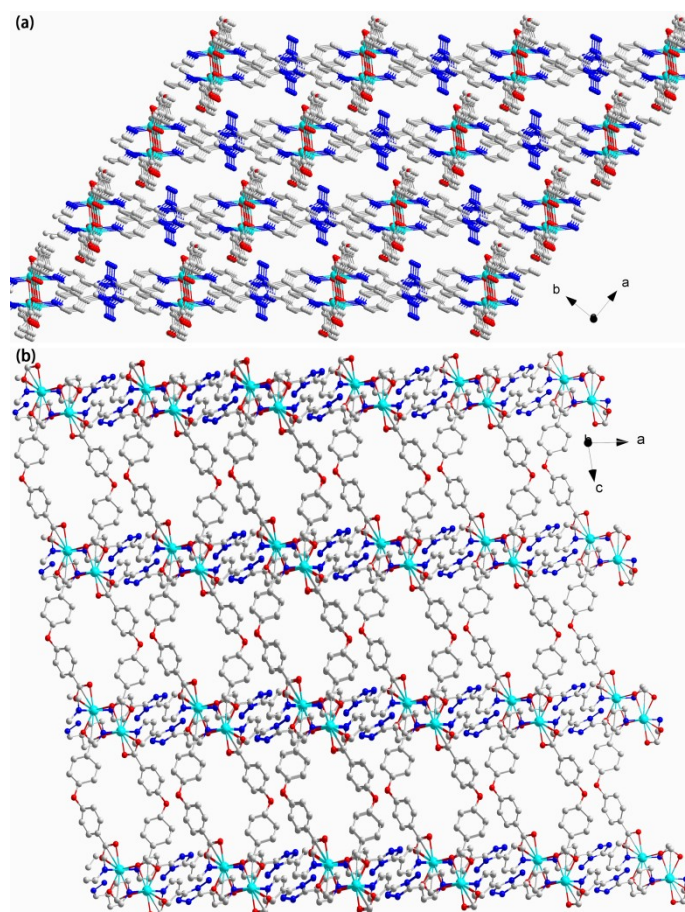

**Fig. S2** The 3D porous structure diagram of Cd-MOF presented in different directions. Color codes: C in light grey, Zn in turquoise, N in blue, and O in red.

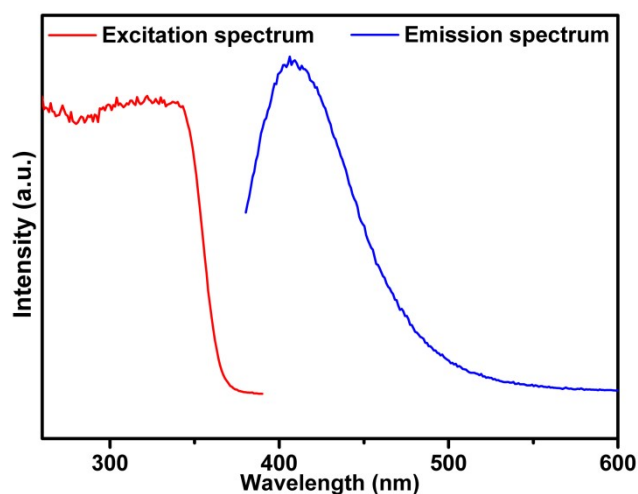

**Fig. S3** The excitation spectrum and emission spectrum of as-synthesized Cd-MOF.

**Table S1.** The CIE coordinates of Cd-MOF under the excitation wavelengths of 290-400 nm using the CIE 1931 chromaticity diagram.

| Excitation wavelength (nm) | CIE coordinates |
|----------------------------|-----------------|
| 290                        | (0.173,0.1116)  |
| 300                        | (0.1733,0.11)   |
| 310                        | (0.1729,0.1079) |
| 320                        | (0.1729,0.1082) |
| 325                        | (0.173,0.1089)  |
| 330                        | (0.1741,0.1113) |
| 335                        | (0.1752,0.1149) |
| 340                        | (0.1786,0.1238) |
| 345                        | (0.1851,0.1416) |
| 350                        | (0.1946,0.169)  |
| 355                        | (0.2105,0.209)  |
| 360                        | (0.2237,0.2437) |
| 365                        | (0.2294,0.2605) |
| 370                        | (0.2308,0.2676) |
| 380                        | (0.2319,0.2747) |
| 390                        | (0.2344,0.2877) |
| 400                        | (0.2406,0.3097) |

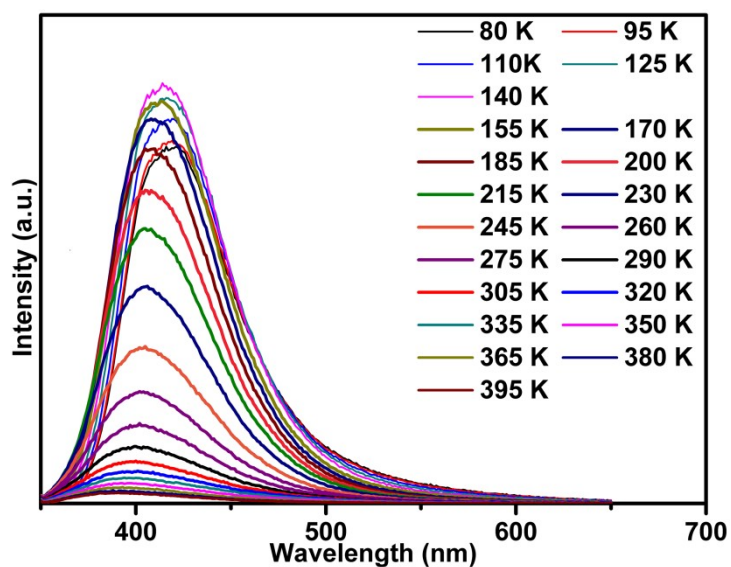

**Fig. S4** Solid-state emission spectra of Cd-MOF measured at 80 K-395 K.

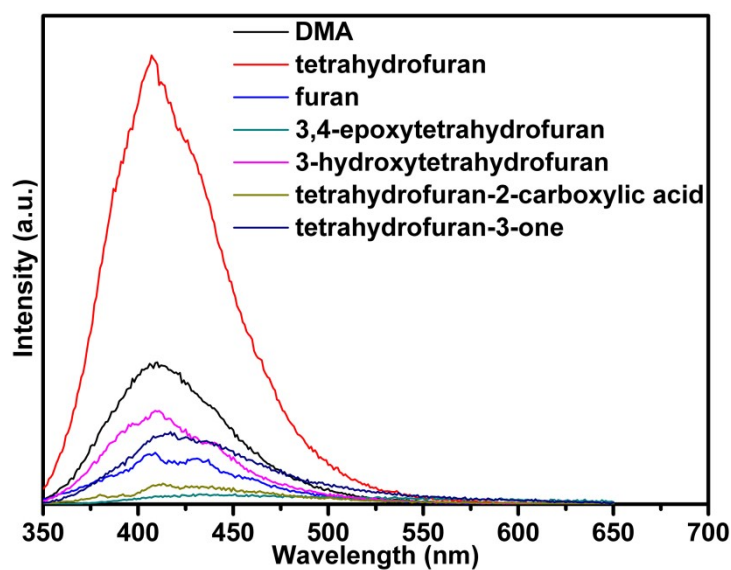

**Fig. S5** Luminescent spectra of Cd-MOF dispersed in different THF structural analogues.

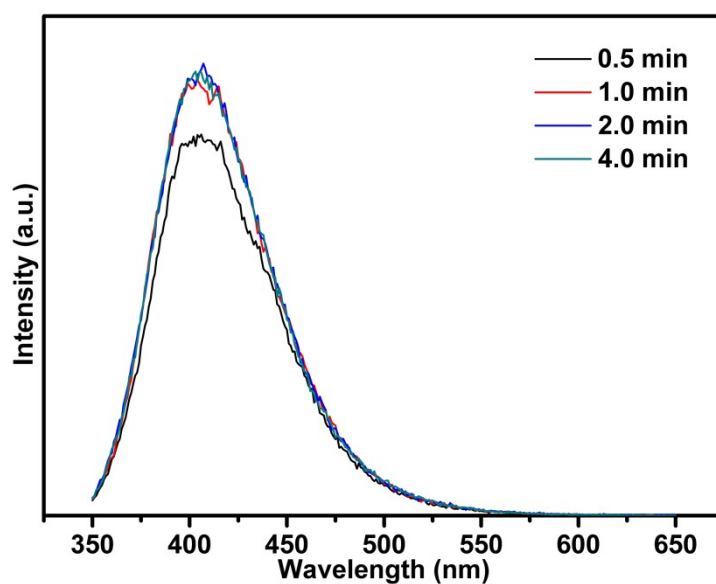

**Fig. S6** Emission spectra of Cd-MOF immersed in THF at various time intervals ( $\lambda_{\text{ex}} = 340 \text{ nm}$ ).

**Table S2.** Comparison of detection methods and response time among other reported materials and Cd-MOF as the THF sensor.

| Compound name                                              | detection methods                                                                | response time | References                                          |
|------------------------------------------------------------|----------------------------------------------------------------------------------|---------------|-----------------------------------------------------|
| [Cu <sub>2</sub> (bdc) <sub>2</sub> (bpy)]                 | luminescent “turn off”                                                           | <1 min        | J. Solid State Chem., 2020, 288, 121397             |
| Sm-2 <sub>e</sub>                                          | luminescent “turn off”                                                           | 5 s           | Analyst, 2019, 144, 5254-5260                       |
| PCN-224                                                    | luminescent “turn off”                                                           | not mention   | J. Solid State Chem., 2020, 282, 121103             |
| PANI-HCl film                                              | electrochemical sensing                                                          | 400 s         | Applied Chemical Industry, 2011, 40, 1336-1339      |
| CuPcS                                                      | electrochemical sensing                                                          | 190 s         | Dyes and Pigments, 2023, 216, 111328                |
| Py-3T                                                      | luminescent “turn on”                                                            | 100 s         | Imaging Science and Photochemistry, 2015, 33, 67-76 |
| [(CuCN) <sub>3</sub> L·(guest) <sub>x</sub> ] <sub>n</sub> | horizontal (wavelength) and vertical (intensity) changes of the emission spectra | not mention   | Chem. Sci., 2013, 4, 1793-1801                      |
| Eu-MOF                                                     | luminescent “turn on”                                                            | 1 min         | Dalton Trans., 2018, 47, 6210-6217                  |
| Cd-MOF                                                     | luminescent “turn on”                                                            | <1 min        | This work                                           |

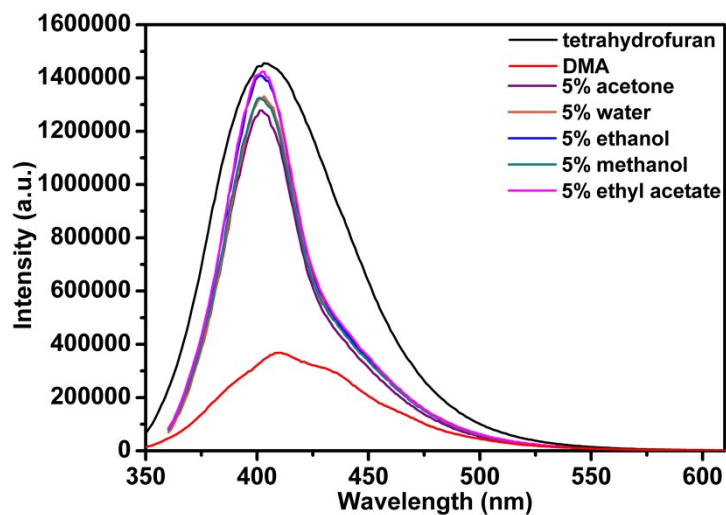

**Fig. S7** Luminescent normalized intensity of Cd-MOF dispersed in THF containing 5% different organic solvents

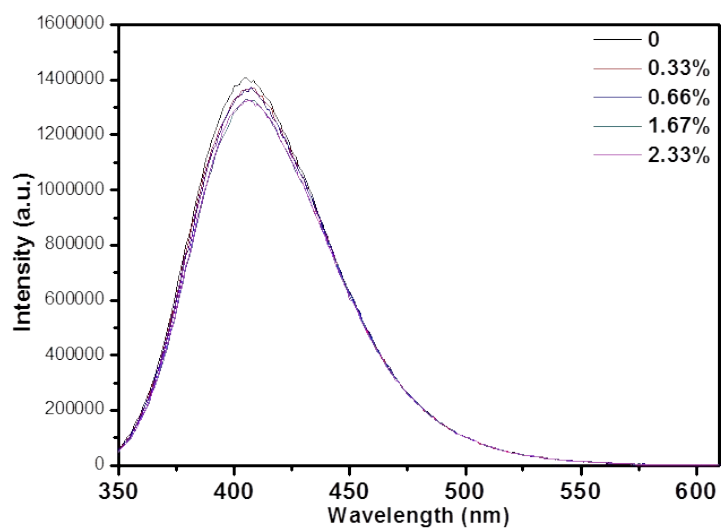

**Fig. S8** Luminescent spectra of Cd-MOF THF suspension after treated with varying amounts of H<sub>2</sub>O.

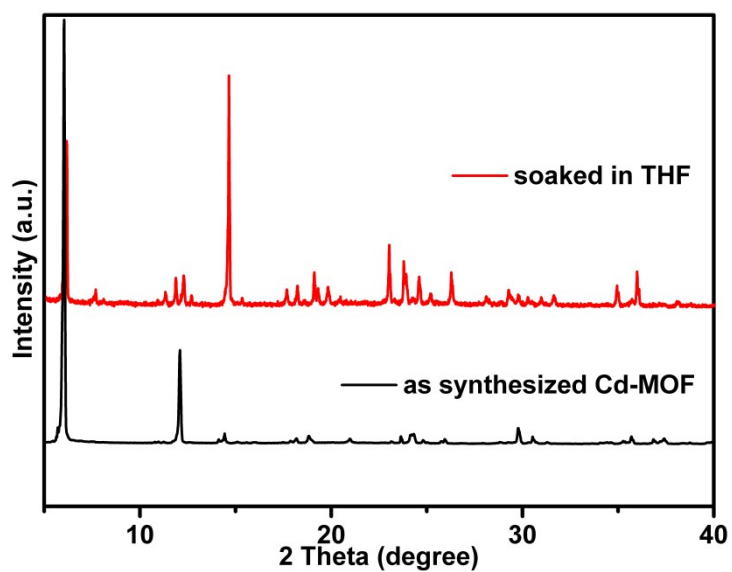

**Fig. S9** The PXRD spectra of Cd-MOF as soaked in THF.

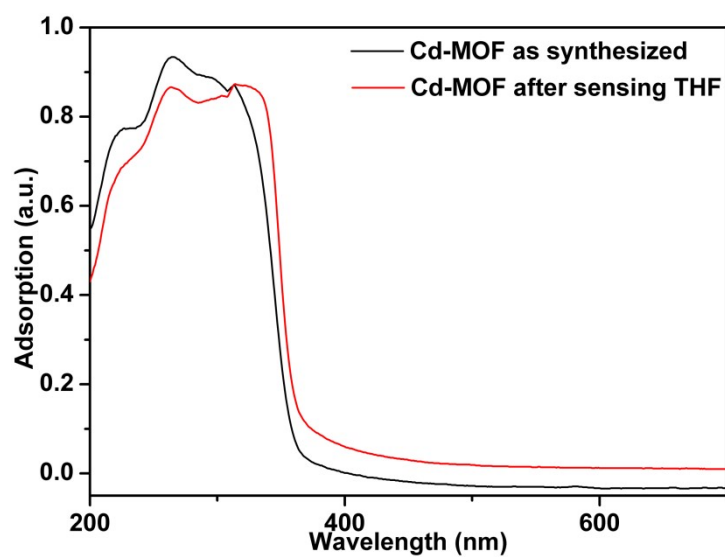

**Fig. S10** The UV-Vis adsorption spectra of Cd-MOF before and after sensing THF.

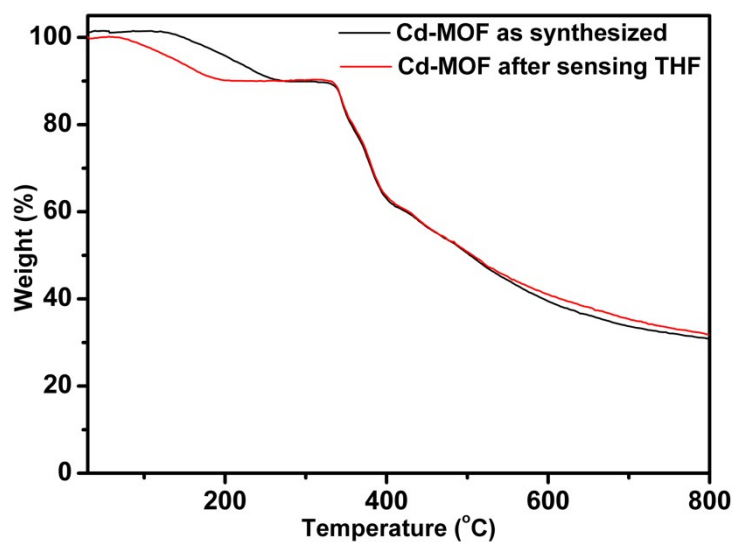

**Fig. S11** The TGA curves of Cd-MOF before and after sensing THF.

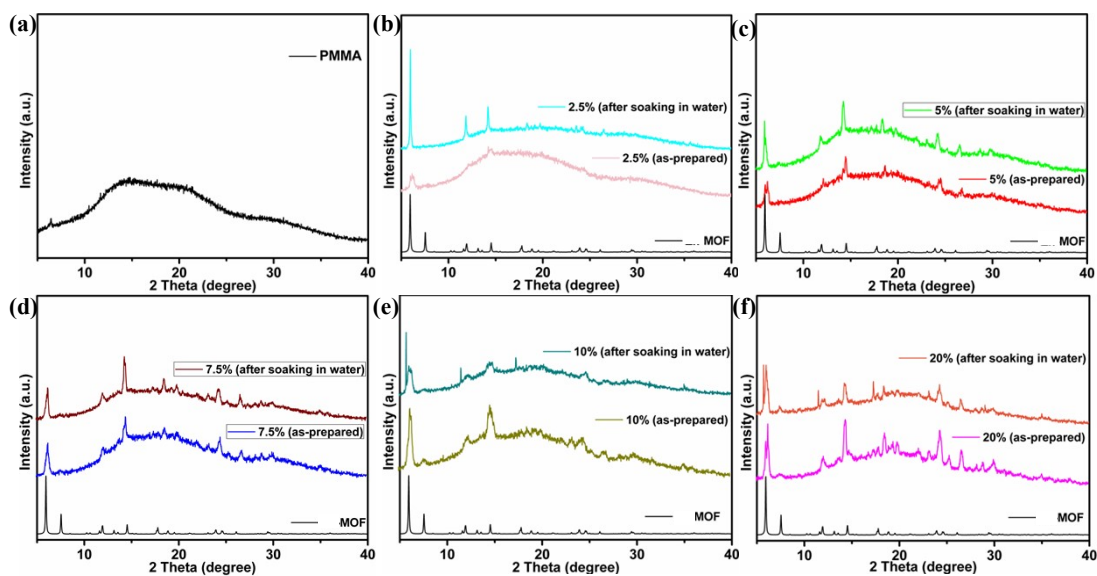

**Fig. S12** The PXRD patterns of PMMA (a) and MMMs with different Cd-MOF loading (b-f).



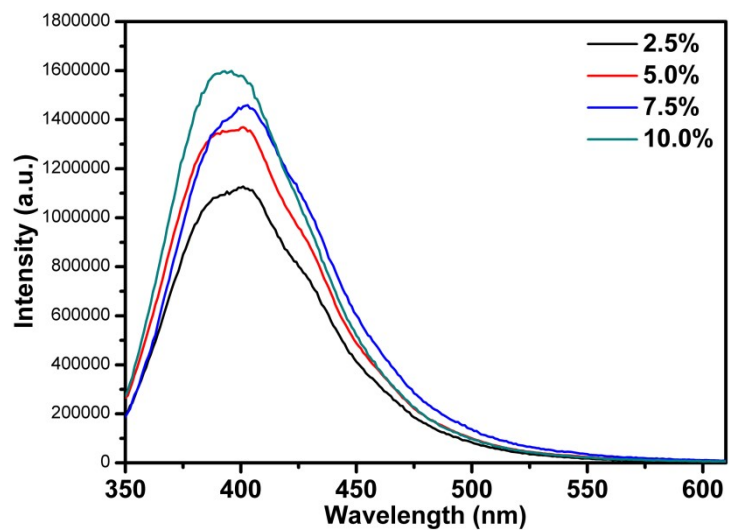

**Fig. S13** Luminescence spectra of MMMs after soaked in water.
